# Supplementary material
Source: publisher site journal article supplement (https://www.dovepress.com/get_supplementary_file.php?f=+311130.docx)
Supplement: Supplementary file 1 [file get_supplementary_file.php]

Supplementary Material

Table S1. Clinical and sleep characteristics of PS (n = 1257) stratified by SWS categories

| Characteristics | > 24.7%  (n = 310) | 17.1–24.7%  (n = 319) | 10.6–17%  (n = 312) | < 10.5%  (n = 316) | p-value |
| --- | --- | --- | --- | --- | --- |
| Demographic and clinical characteristics | | | | | |
| Men, n (%) | 194 (62.6) | 190 (59.6) | 203 (65.1) | 201 (63.6) | 0.531 |
| Age, y | 38.62±12.00 | 37.65±11.98 | 39.33±11.59 | 42.59±11.98 | <0.001 |
| Neck circumference (cm) | 36.52±3.47 | 36.39±3.63 | 36.70±3.67 | 36.80±4.92 | 0.588 |
| Waist circumference (cm) | 87.24±11.55 | 86.79±10.44 | 86.50±9.73 | 87.35±10.97 | 0.746 |
| Hip circumference (cm) | 96.65±8.04 | 96.72±6.90 | 96.64±6.54 | 97.29±7.67 | 0.649 |
| Waist hip ratio | 0.90±0.07 | 0.90±0.07 | 0.89±0.06 | 0.90±0.07 | 0.656 |
| Body mass index, kg/m2 | 24.37±3.68 | 24.02±3.80 | 24.02±3.50 | 24.57±3.86 | 0.173 |
| Hypertension, n (%) | 35 (11.3) | 32 (10.0) | 26 (8.3) | 39 (12.3) | 0.395 |
| SBP (mmHg) | 119.23±16.32 | 118.99±13.95 | 121.60±14.92 | 122.19±13.61 | 0.016 |
| DBP (mmHg) | 76.84±10.28 | 76.86±10.48 | 78.04±10.52 | 77.87±9.52 | 0.336 |
| Diabetes mellitus, n (%) | 24 (7.7) | 9 (2.8) | 5 (1.6) | 27 (8.5) | <0.001 |
| Hyperlipidemia, n (%) | 61 (19.7) | 54 (16.9) | 58 (18.6) | 59 (18.7) | 0.846 |
| Tobacco use, n (%) | 47 (15.2) | 58 (18.2) | 60 (19.2) | 70 (22.2) | 0.161 |
| Alcohol consumption, n (%) | 139 (44.8) | 172 (53.9) | 144 (46.2) | 144 (45.6) | 0.077 |
| Fasting glucose (mmol/L) | 5.22±1.41 | 5.08±0.95 | 5.01±0.72 | 5.24±1.23 | 0.028 |
| Fasting insulin (µU/mL) | 7.73(5.29) | 7.79(6.54) | 7.87(5.59) | 7.45(6.11) | 0.584 |
| IR | 85 (27.4) | 87 (27.3) | 84 (26.9) | 90 (28.5) | 0.975 |
| HOMA-IR | 1.77(1.35) | 1.71(1.48) | 1.73(1.44) | 1.67(1.56) | 0.164 |
| Cholesterol (mmol/L) | 4.45(1.17) | 4.33(1.09) | 4.38(1.32) | 4.36(1.18) | 0.936 |
| Triglyceride (mmol/L) | 1.16(0.85) | 1.20(0.87) | 1.21(1.01) | 1.26(1.09) | 0.251 |
| High density lipoprotein (mmol/L) | 1.07(0.28) | 1.12(0.37) | 1.11(0.34) | 1.07(0.34) | 0.007 |
| Low density lipoprotein (mmol/L) | 2.73(0.96) | 2.63(1.05) | 2.67(1.05) | 2.50(1.05) | 0.336 |
| ApolipoproteinA-1 (g/L) | 1.04(0.23) | 1.05(0.26) | 1.08(0.26) | 1.10(0.28) | 0.005 |
| Apolipoprotein-B (g/L) | 0.76(0.25) | 0.75(0.28) | 0.76(0.26) | 0.74(0.23) | 0.693 |
| Apolipoprotein-E (mg/dL) | 3.77(1.41) | 3.76(1.58) | 3.73(1.56) | 3.84(1.60) | 0.337 |
| Lipoprotein-α (mg/dL) | 6.95(10.40) | 8.20(16.12) | 9.40(16.24) | 7.40(12.00) | 0.013 |
| ESS | 5.00(9.00) | 6.00(8.00) | 3.00(8.00) | 4.00(9.00) | 0.004 |
| ESS > 10, n (%) | 52 (16.8) | 60 (18.8) | 37 (11.9) | 44 (13.9) | 0.077 |
| Polysomnography | | | | | |
| Total sleep time, min | 384.20±85.53 | 375.63±80.50 | 387.07±70.75 | 372.85±89.15 | 0.092 |
| Sleep efficiency, % | 89.89±14.74 | 89.01±12.71 | 90.97±10.13 | 87.91±15.67 | 0.033 |
| N1, % TST | 17.68±13.07 | 15.45±9.24 | 17.79±10.02 | 24.46±16.03 | <0.001 |
| N2, % TST | 35.95±15.77 | 50.97±9.25 | 55.07±10.03 | 56.30±14.38 | <0.001 |
| SWS, % TST | 35.44±9.58 | 20.61±2.28 | 13.74±1.85 | 5.40±3.44 | <0.001 |
| REM, % TST | 10.89±7.42 | 12.67±6.02 | 13.15±6.87 | 13.61±7.46 | <0.001 |
| AHI, events/h | 2.20(2.30) | 1.80(2.50) | 1.75(2.50) | 1.80(2.60) | 0.269 |
| Lowest SaO2, % | 92.00(5.00) | 93.00(5.00) | 93.00(4.10) | 93.00(5.00) | <0.001 |
| ODI | 1.90(2.90) | 1.80(2.70) | 2.10(3.30) | 2.00(2.80) | 0.013 |
| Mean SaO2 | 96.00(1.85) | 97.00(1.00) | 97.00(1.00) | 97.00(1.00) | <0.001 |
| Micro arousal index, events/h | 12.55(10.10) | 14.00(12.10) | 13.65(12.68) | 13.90(14.80) | 0.004 |

Continuous variables were shown as means±SD. Skewed data were presented as median (IQR). Categorical data were presented as the number (percentage). ANOVA, the Kruskal-Wallis tests, and the χ2 test were used to further analyze the data. Acronyms: PS, primary snorers; SWS, slow wave sleep; SBP, systolic blood pressure; DBP, diastolic blood pressure; IR, insulin resistance; HOMA-IR, homeostasis model assessment for insulin resistance; ESS, Epworth Sleepiness Scale; REM, rapid eye movement; AHI, apnea-hypopnea index; SaO2, oxygen saturation; ODI, oxygen desaturation index; P-value: significant difference among all four groups.

Table S2. Adjusted ORs and 95% CIs of IR associated with SWS in different subgroups

| Predictors | Sex | | Age | | BMI | |
| --- | --- | --- | --- | --- | --- | --- |
| Men | Women | < 60 | ≥ 60 | < 28 kg/m2 | ≥ 28 kg/m2 |
| n | 5565 | 1401 | 6072 | 894 | 4637 | 2329 |
| PS | Reference | Reference | Reference | Reference | Reference | Reference |
| ＞21.3% | 1.150 (0.906–1.461) | 1.480 (0.953–2.298) | 1.131 (0.910–1.405) | 1.901 (0.869–4.159) | *1.457 (1.157–1.835) | 1.095 (0.710–1.689) |
| 13.1–21.3% | 1106 (0.876–1.398) | *1.802 (1.143–2.841) | 1.131 (0.913–1.401) | 1.981 (0.913–4.300) | *1.351 (1.075–1.697) | 1.269 (0.820–1.962) |
| 6.5–13% | 0.973 (0.763–1.242) | *1.770 (1.088–2.880) | 1.009 (0.806–1.263) | 1.713 (0.775–3.785) | 1.210 (0.950–1.541) | 1.195 (0.764–1.868) |
| <6.5% | *1.314 (1.016–1.701) | 1.416 (0.798–2.511) | *1.294 (1.016–1.648) | 1.925 (0.865–4.282) | *1.583 (1.223–2.050) | 1.253 (0.780–2.013) |
| p for linear trend | 0.057 | 0.093 | 0.095 | 0.504 | 0.002 | 0.766 |

Model was adjusted for age (not in the subgroup of age), BMI (not in the subgroup of BMI), sex (not in the subgroup of sex), alcohol consumption, smoking, hypertension, diabetes mellitus, hyperlipidemia, TST, SE, ESS, and AHI. Logistic regression was used to further analyze the data. Acronyms: OR, odds ratio; CI, confidence interval; IR, insulin resistance; SWS, slow wave sleep; PS, primary snorers; TST, total sleep time; SE, sleep efficiency; ESS, Epworth Sleepiness Scale; AHI, apnea-hypopnea index. *p indicated a significant difference. Group of PS was the reference category in analyses of different subgroups.

Table S3. Coefficients and p-values for the interaction of AHI and SWS on IR by multivariate linear regression

| HOMA-IR as dependent variable | | | |
| --- | --- | --- | --- |
| Model 1 of independent variable | Unstandardized B | Standardized Beta | Significance (P-value) |
| constant | 3.157 | / | <0.001 |
| SWS category | -0.302 | -0.060 | <0.001 |
| AHI category | 0.455 | 0.095 | <0.001 |
| AHI*SWS | 0.001 | 0.060 | 0.001 |
| Model 2 of independent variable | Unstandardized B | Standardized Beta | Significance |
| constant | 2.881 | / | <0.001 |
| SWS％ | -0.030 | -0.069 | <0.001 |
| AHI category | 0.431 | 0.090 | <0.001 |
| AHI*SWS | 0.001 | 0.075 | <0.001 |

The formula of Model 1 was HOMA-IR=3.157-0.302(SWS category)+0.455(AHI category)+0.001AHI*SWS. The formula of Model 2 was HOMA-IR=2.881-0.030(SWS％)+0.431(AHI category)+0.001AHI*SWS. Multivariate linear regression was used to further analyze the data. Acronyms: OR, odds ratio; CI, confidence interval; AHI, apnea-hypopnea index; SWS, slow wave sleep; IR, insulin resistance.
